# Supplementary material for: Lysine-based amino-functionalized lipids for gene transfection: the protonation state in monolayers at the air–liquid interface
Source: Royal Society of Chemistry journal article supplement (doi:10.1039/c7cp03107f), 2017-01-01
Supplement: c7cp03107f1.pdf [file c7cp03107f1.pdf]

## Supporting Information

### Lysine-based amino-functionalized lipids for gene transfection: A study of the protonation state at the air-liquid interface

Stephanie Taßler<sup>a</sup>, Christian Wölk<sup>b</sup>, Christopher Janich<sup>b</sup>, Bodo Dobner<sup>b</sup> and Gerald Brezesinski<sup>a</sup>

<sup>a</sup> Max Planck Institute of Colloids and Interfaces, Science Park Potsdam-Golm, Am Mühlenberg 1, 14476 Potsdam, Germany

<sup>b</sup> Martin-Luther-University (MLU) Halle-Wittenberg, Institute of Pharmacy, Wolfgang-Langenbeck-Straße 4, 06120 Halle (Saale), Germany

#### Table of Contents:

#### 1. Additional Data

##### 1.1 $\pi/A$ -Isotherms and corresponding Surface Gibbs Elasticity at 20 °C on HBr buffer (c = 2 mM, different pH values)

- 1.1.1 DODAB
- 1.1.2 TH10
- 1.1.3 OO10
- 1.1.4 TH4
- 1.1.5 OH4
- 1.1.6 OO4
- 1.1.7 TH14
- 1.1.8 OH14
- 1.1.9 OO14

##### 1.2 Total Reflection X-Ray Fluorescence at 20 °C on HBr buffer (c = 2 mM, different pH values)

- 1.2.1 Titration curve of OO10 (5 mN·m<sup>-1</sup> and 30 mN·m<sup>-1</sup>)
- 1.2.2 Titration curve of OO4 (5 mN·m<sup>-1</sup> and 30 mN·m<sup>-1</sup>)

##### 1.3 X-Ray Reflectivity at 20 °C on HBr buffer (c = 2 mM, pH 3, pH 10)

- 1.3.1 OO10 ( $\pi$  = 30 mN·m<sup>-1</sup>)
- 1.3.2 OO4 ( $\pi$  = 30 mN·m<sup>-1</sup>)

#### 1. Additional Data

##### 1.1 $\pi/A$ -Isotherms and Surface Gibbs Elasticity

The surface Gibbs elasticity  $\epsilon_0$  (also called surface compressional modulus  $C_s^{-1}$ ) defines the elastic modulus representing a rheological quantity related to the monolayer rigidity and the capacity of a monolayer for energy storage. It can be obtained from the  $\pi/A$  – isotherms by the first derivation:

$$\epsilon_0 = -A(d\pi/dA)_T$$

where  $A$  is the molecular area and  $d\pi/dA$  is the slope of the isotherm at given molecular area.  $\varepsilon_0$  is plotted versus the lateral pressure or the molecular area.

$\varepsilon_0 < 12.5$  mN/m: gas-analogue phase state (G)

$\varepsilon_0 \approx 13 - 100$  mN/m: liquid-expanded phase state (LE)

$\varepsilon_0 \approx 100 - 250$  mN/m: liquid-condensed phase state (LC) with tilted alkyl chains

$\varepsilon_0 > 250$  mN/m: solid phase state (SC, liquid-condensed phase state with untilted alkyl chains)

## References

- 1 J. T. Davis and E. K. Rideal, *Interfacial Phenomena*, Academic Press, New York, 2<sup>nd</sup> Edition, 1963.
- 2 G. L. Gaines, *Insoluble monolayers at liquid-gas interfaces*, John Wiley & Sons Inc, 1<sup>st</sup> Edition., 1966.

### 2.1.1 DODAB

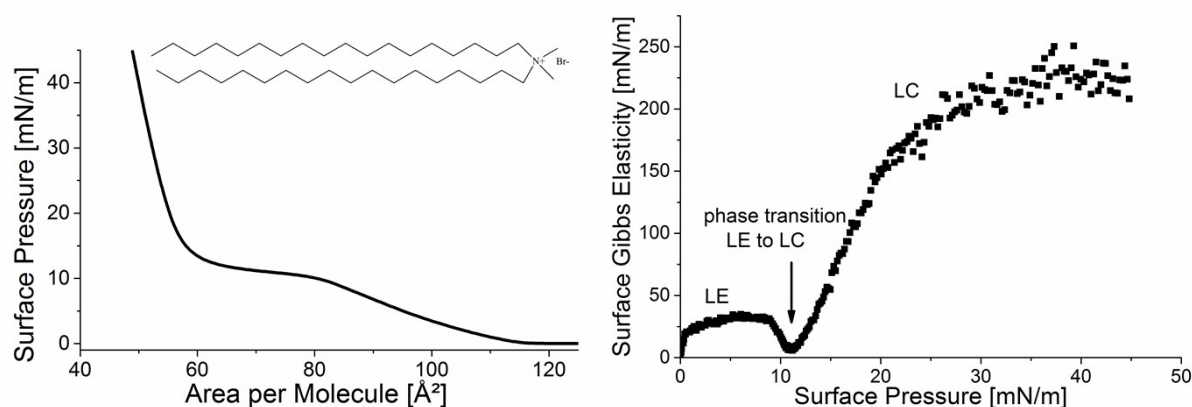

**Figure S1:**  $\pi/A$ -isotherm and surface Gibbs elasticity of **DODAB** at 20 °C on KCl buffer ( $c = 10$  mM)

### 2.1.2 TH10

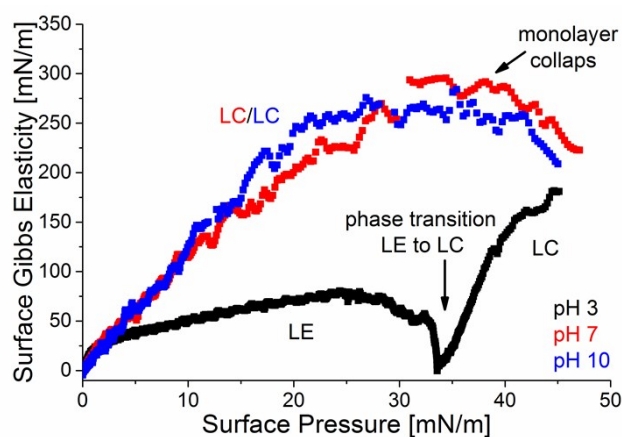

**Figure S2:** Surface Gibbs elasticity of **TH10** at 20 °C on HBr buffer ( $c = 2$  mM)

### 2.1.3 OO10

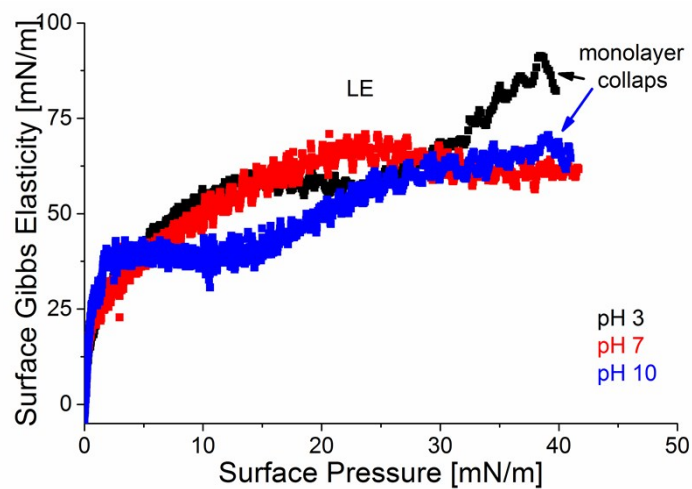

**Figure S3:** Surface Gibbs elasticity of **OO10** at 20 °C on HBr buffer (c = 2 mM)

### 2.1.4 TH4

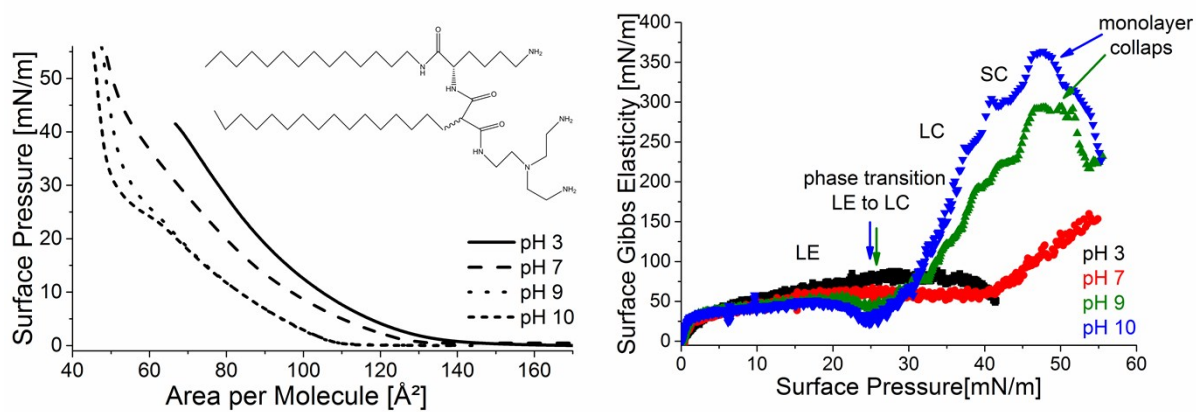

**Figure S4:**  $\pi/A$ -isotherm and surface Gibbs elasticity of **TH4** at 20 °C on HBr buffer (c = 2 mM)

### 1.1.5 OH4

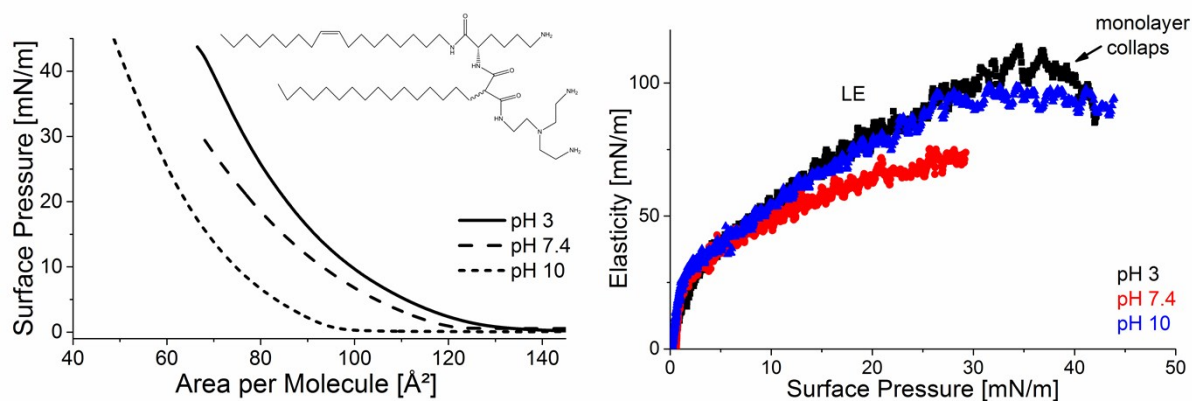

**Figure S5:**  $\pi/A$ -isotherm and surface Gibbs elasticity of **OH4** at 20 °C on HBr buffer (c = 2 mM)

### 1.1.6 OO4

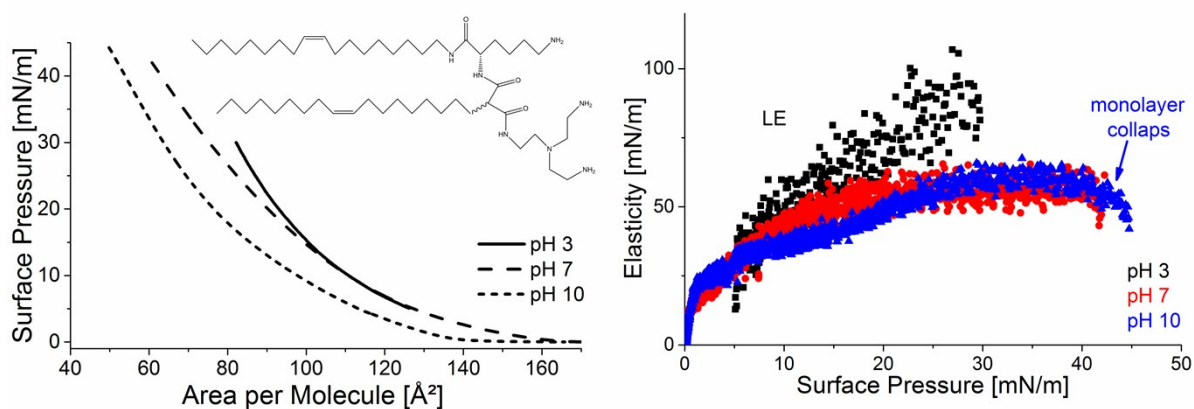

**Figure S6:**  $\pi/A$ -isotherm and surface Gibbs elasticity of **OO4** at 20 °C on HBr buffer (c = 2 mM)

### 1.1.7 TH14

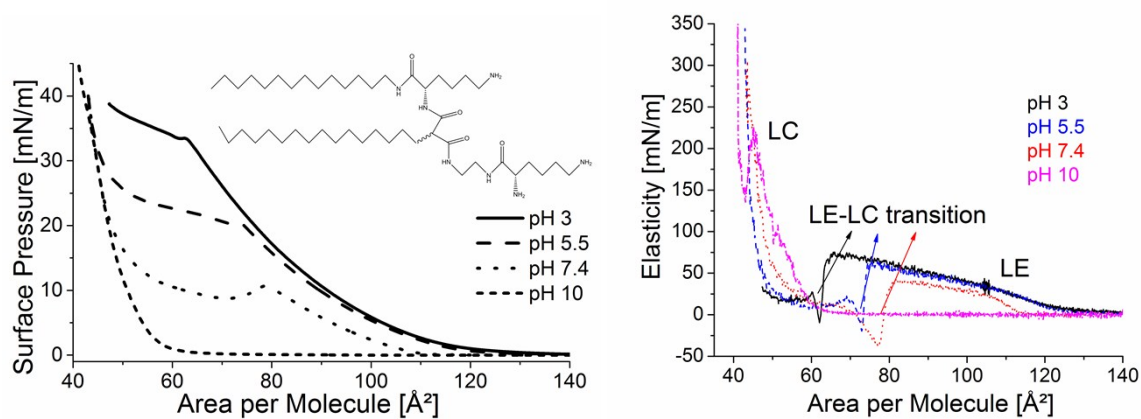

**Figure S7:**  $\pi/A$ -isotherm and surface Gibbs elasticity of **TH14** at 20 °C on HBr buffer (c = 2 mM)

### 1.1.8 OH14

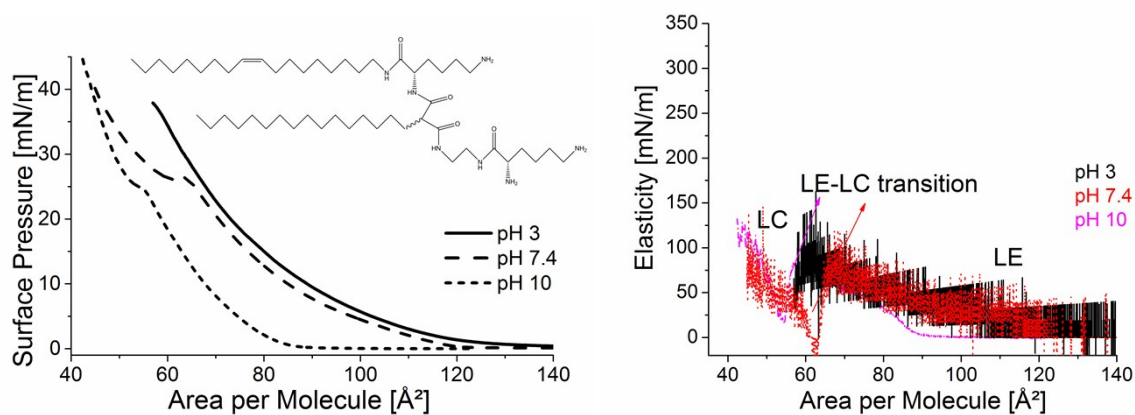

**Figure S8:**  $\pi/A$ -isotherm and surface Gibbs elasticity of **OH14** at 20 °C on HBr buffer ( $c = 2$  mM)

### 1.1.9 OO14

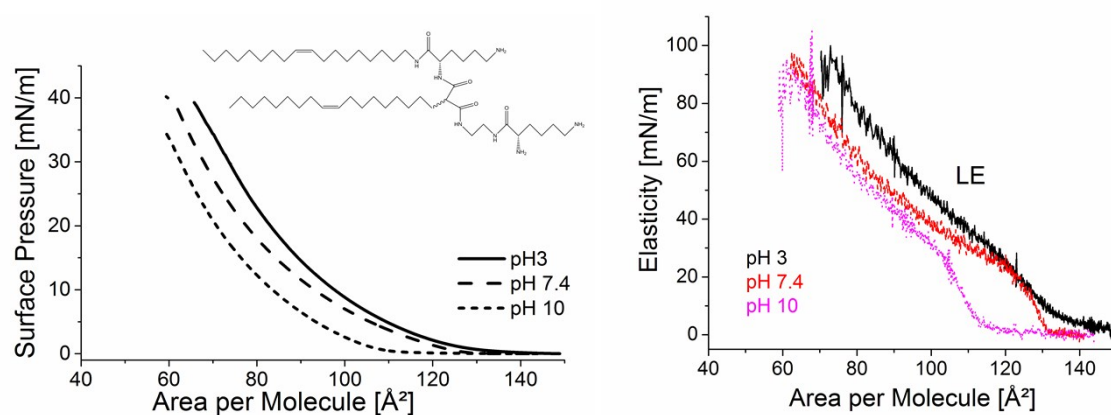

**Figure S9:**  $\pi/A$ -isotherm and surface Gibbs elasticity of **OO14** at 20 °C on HBr buffer ( $c = 2$  mM)

## 1.2 Total Reflection X-Ray Fluorescence

### 1.2.1 Titration curve of **OO10** (5 mN·m<sup>-1</sup> and 30 mN·m<sup>-1</sup>)

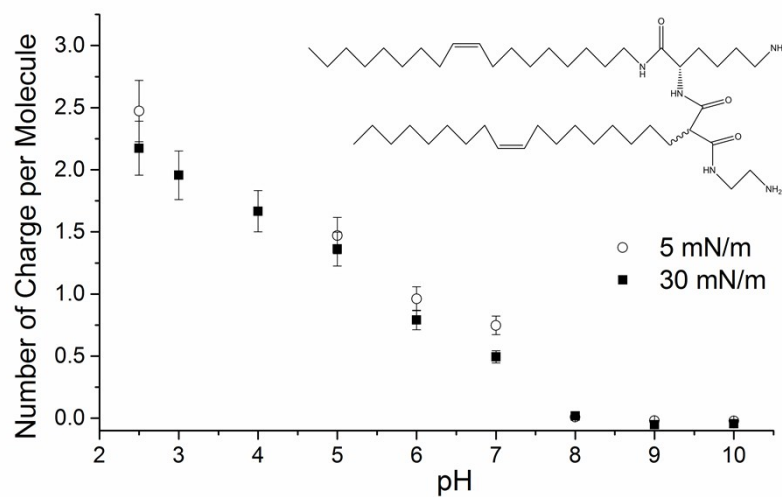

**Figure S10:** Number of Charge per Molecule for **OO10** on HBr buffer (2 mM, different pH values) at room temperature,  $\pi = 5 \text{ mN}\cdot\text{m}^{-1}$  (o) and  $\pi = 30 \text{ mN}\cdot\text{m}^{-1}$  (▪)

### 1.2.2 Titration curve of **OO4** (5 mN·m<sup>-1</sup> and 30 mN·m<sup>-1</sup>)

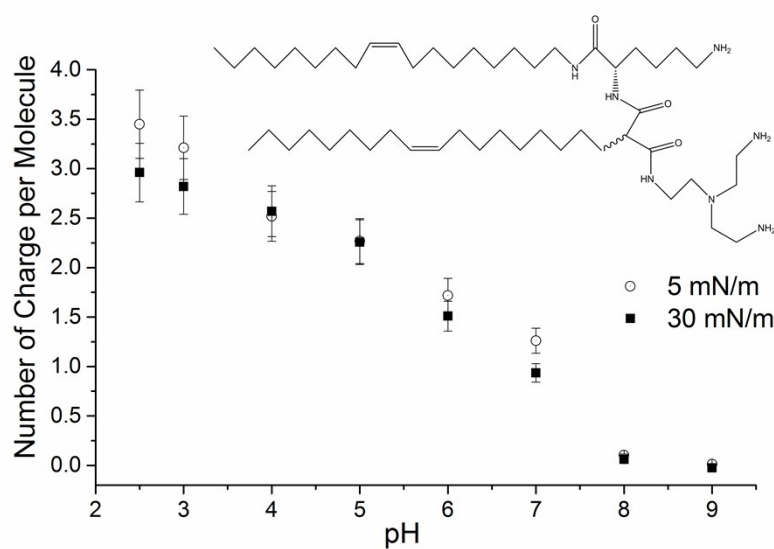

**Figure S11:** Number of Charge per Molecule for **OO4** on HBr buffer (2 mM, different pH values) at room temperature,  $\pi = 5 \text{ mN}\cdot\text{m}^{-1}$  (o) and  $\pi = 30 \text{ mN}\cdot\text{m}^{-1}$  (▪)

## 1.3 X-Ray Reflectivity

### 1.3.1 OO10

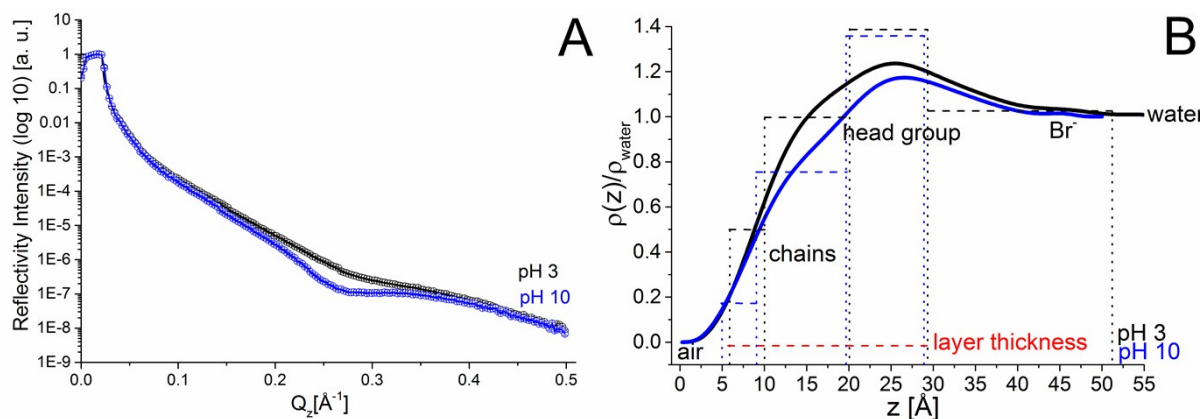

**Figure S12:** **A** X-ray reflectivity of **OO10** at 20 °C on HBr buffer at 30 mN·m<sup>-1</sup>, **B** electron density normalized to that of water versus  $z$ . The box-model is shown.

**Table S1:** structural data obtained from fits of the specular X-ray reflectivity curves of OO10 on HBr buffer pH 3 and pH 10, 20 °C, 30 mN·m<sup>-1</sup>.

|       | chain   |                             |                            |                                 | head group |                             |                            |                                 | measured numbers of electrons |
|-------|---------|-----------------------------|----------------------------|---------------------------------|------------|-----------------------------|----------------------------|---------------------------------|-------------------------------|
|       | $z$ [Å] | $\rho$ [e-/Å <sup>3</sup> ] | $e^-$ [e-/Å <sup>2</sup> ] | theoretical number of electrons | $z$ [Å]    | $\rho$ [e-/Å <sup>3</sup> ] | $e^-$ [e-/Å <sup>2</sup> ] | theoretical number of electrons |                               |
| pH 3  | 14.222  | 1.24                        | 3.668                      | 286                             | 9.429      | 1.39                        | 4.382                      | 146                             | 287                           |
| pH 10 | 14.756  | 0.925                       | 2.909                      | 286                             | 9.24       | 1.359                       | 4.199                      | 146                             | 250                           |

10 e<sup>-</sup> for H<sub>2</sub>O; 36 e<sup>-</sup> for Br<sup>-</sup>

### 1.3.2 OO4

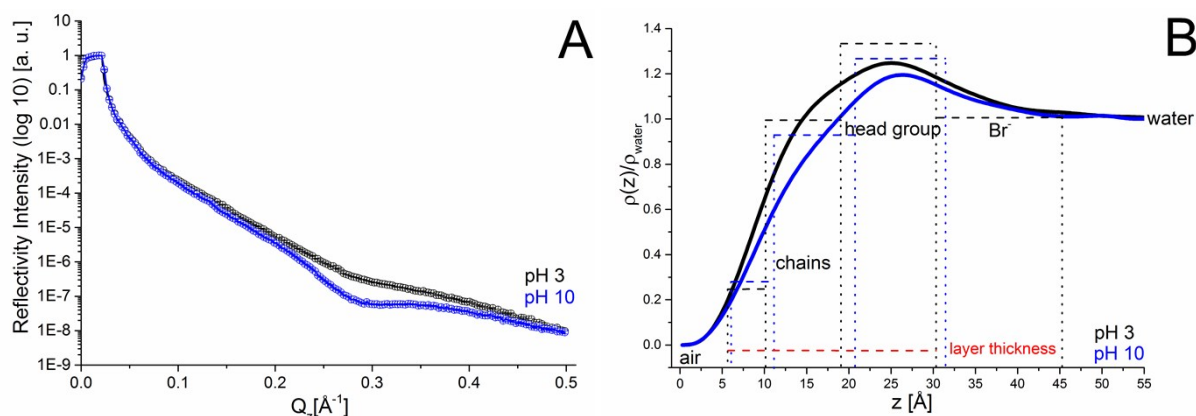

**Figure S13:** **A** X-ray reflectivity of **OO4** at 20 °C on HBr buffer at 30 mN·m<sup>-1</sup>, **B** electron density normalized to that of water versus  $z$ . The box-model is shown.

**Table S2:** structural data obtained from fits of the specular X-ray reflectivity curves of OO4 on HBr buffer pH 3 and pH 10, 20 °C, 30 mN·m<sup>-1</sup>.

|              | chain  |                             |                                                    |                                       | head group |                             |                                                    |                                       |                                     |
|--------------|--------|-----------------------------|----------------------------------------------------|---------------------------------------|------------|-----------------------------|----------------------------------------------------|---------------------------------------|-------------------------------------|
|              | z [Å]  | $\rho$ [e-/Å <sup>3</sup> ] | e <sup>-</sup> [e <sup>-</sup> / Å <sup>-2</sup> ] | theoretical<br>number of<br>electrons | z [Å]      | $\rho$ [e-/Å <sup>3</sup> ] | e <sup>-</sup> [e <sup>-</sup> / Å <sup>-2</sup> ] | theoretical<br>number of<br>electrons | measured<br>numbers of<br>electrons |
| <b>pH 3</b>  | 13.492 | 1.24                        | 3.421                                              | 286                                   | 11.267     | 1.332                       | 5.029                                              | 194                                   | 413                                 |
| <b>pH 10</b> | 14.606 | 1.207                       | 3.412                                              | 286                                   | 10.872     | 1.27                        | 4.617                                              | 194                                   | 294                                 |

10 e<sup>-</sup> for H<sub>2</sub>O; 36 e<sup>-</sup> for Br<sup>-</sup>
